# Supplementary material for: One-step fabrication of high quantum yield sulfur- and nitrogen-doped carbon dots for sensitive and selective detection of Cr(vi)
Source: Royal Society of Chemistry journal article supplement (doi:10.1039/c6ra21059g), 2016-01-01
Supplement: c6ra21059g1.pdf [file c6ra21059g1.pdf]

## Supporting Information

### **One-step fabrication of high quantum yield sulfur- and nitrogen-doped carbon dots for sensitive and selective detection of Cr (VI)**

Saihua Wang<sup>a,b</sup>, Hongyun Niu<sup>a\*</sup>, Sijing He<sup>a</sup>, Yaqi Cai<sup>a</sup>

<sup>a</sup> State Key Laboratory of Environmental Chemistry and Ecotoxicology of Research  
Center for Eco-Environmental Sciences, Chinese Academy of Sciences, Beijing  
100085, China

<sup>b</sup> University of Chinese Academy of Sciences, Beijing, 100049, China

\*Corresponding author:

E-mail Address: hyniu@rcees.ac.cn

Tel: (086) 010-62849182;

Fax: (086) 010-62849182

### Determination of fluorescence quantum yield

The quantum yield of the carbon dots was measured according to the reported method.<sup>1</sup> Quinine sulfate dispersed in 0.1 M H<sub>2</sub>SO<sub>4</sub> (quantum yield: 0.54 at 360nm) was used as a standard. Absolute values were calculated using the standard reference sample that had a fixed and known fluorescence quantum yield value. In order to minimize absorption effects absorbencies, the absorbance of the solutions for carbon dots and quinine sulfate was kept below 0.05 at 360 nm. For calculation of QY, five concentrations of quinine sulfate and carbon dots were made respectively. Quinine sulfate was dissolved in 0.1 M H<sub>2</sub>SO<sub>4</sub> (refractive index ( $\eta$ ) of 1.33) and the carbon dots were dissolved in water ( $\eta$ =1.33). An UV–Vis absorption spectrometer was used to determine the absorbance values of the samples at a 360 nm excitation wavelength. The respective solvents were used as the references. A quartz cuvette with a path length of 1.00 cm was used to contain the samples during the UV-Vis and FL experiments. A Hitachi F-4600 fluorescence spectrophotometer set with an excitation slit width of 0.3 nm and an emission slit width of 0.3 nm was used to excite the samples at 360 nm and to record their FL spectra. The integrated fluorescence intensity is the area under the PL curve in the wavelength range from 370 to 600 nm. The QY was calculated by the equation:

$$Q_{CD} = Q_R \cdot \frac{I_{CD}}{I_R} \cdot \frac{A_R}{A_{CD}} \cdot \frac{\eta_{CD}^2}{\eta_R^2}$$

where ‘ $Q$ ’ is the quantum yield, ‘ $I$ ’ is the integrated area of the fluorescence spectra, ‘ $A$ ’ is the absorbance at excited wavelength and ‘ $\eta$ ’ is the refractive index of the solvent used. The subscripts ‘CD’ for carbon dots and ‘R’ for reference are used in this equation.

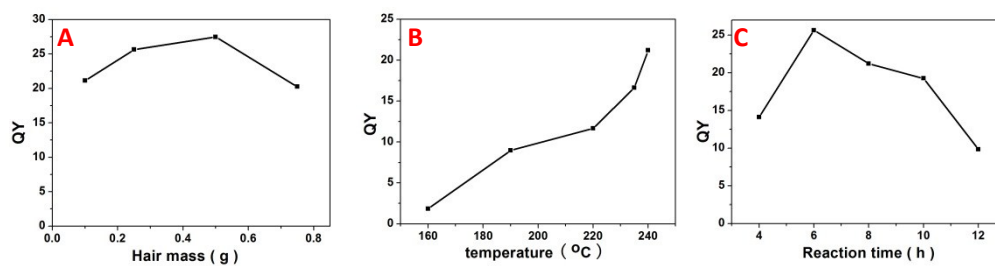

**Figure S1** Effect of wool-mass (A), temperature of the hydrothermal method (B), and time of reaction (C) on the quantum yield (QY) of W-CDs

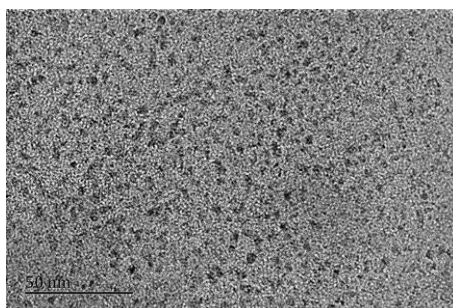

**Figure S2** TEM image of the P-CDs

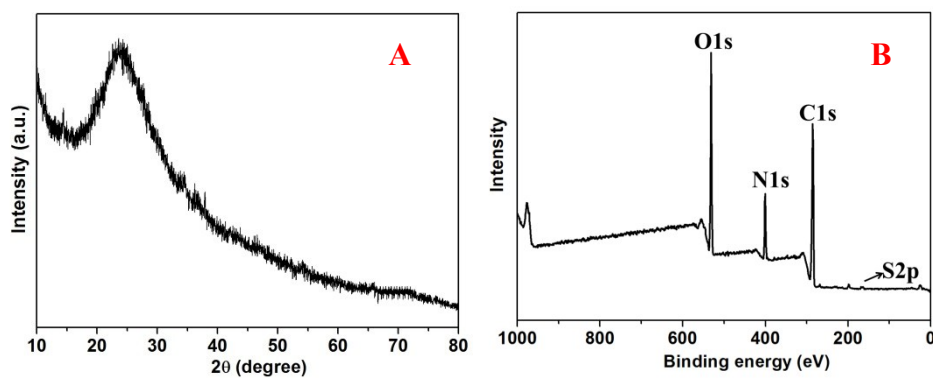

**Figure S3** XRD (A) and XPS (B) spectrum of W-CDs

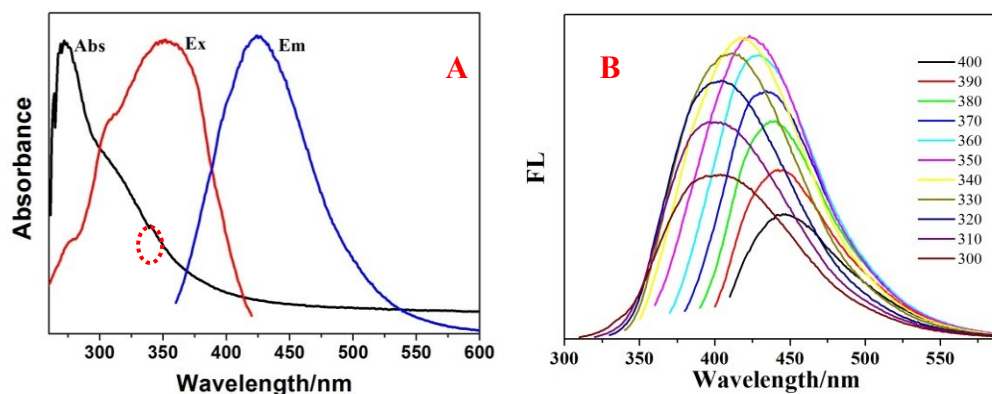

**Figure S4** (A) UV-vis absorption, excitation and emission spectra of W-CDs. (B) The excitation-dependent emission spectra of W-CDs

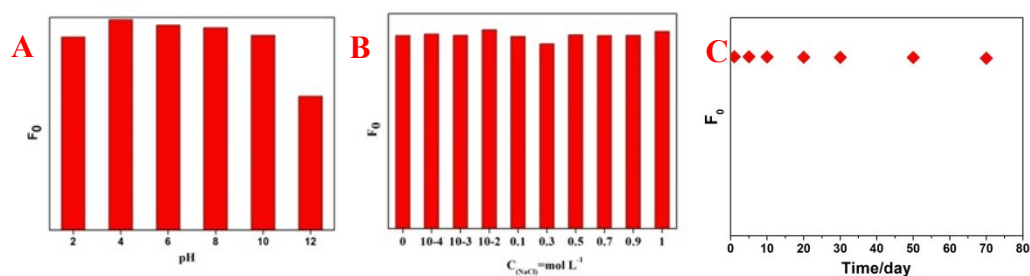

**Figure S5** (A) FL responses of W-CDs at different pH values, (B) FL intensity of the W-CDs in the NaCl solution, (C) Stability of the W-CDs as a function of the storage time.

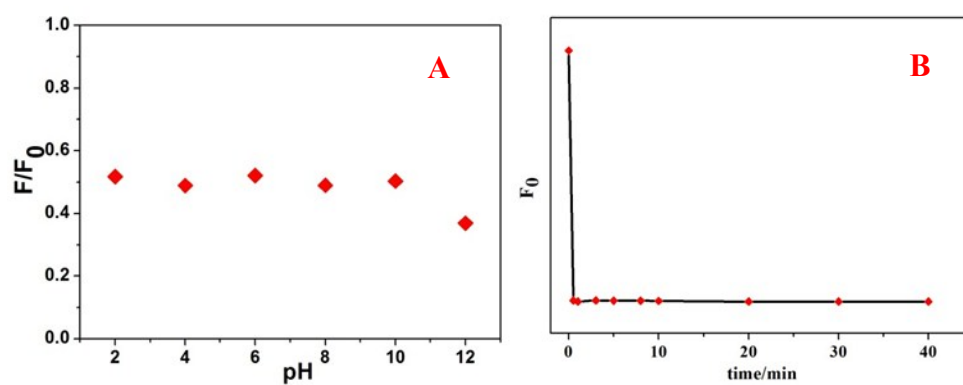

**Figure S6** FL intensity of the W-CDs as a function of the pH value (A) and reaction time (B) in the presence of 100  $\mu M$  of Cr (VI).

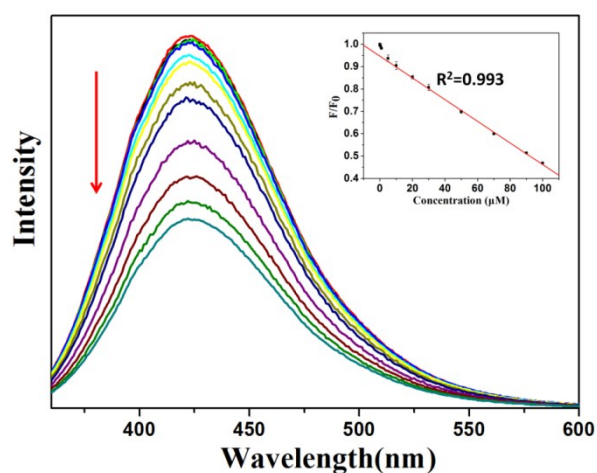

**Figure S7** Fluorescent emission spectra of P-CDs upon addition of various concentration of Cr (VI) (from top to bottom, 0, 0.05, 0.5, 1, 5, 8, 10, 20, 30, 50, 70, 90 and 100  $\mu\text{M}$ ). Insets show the dependence of  $F/F_0$  on the concentration of Cr (VI).

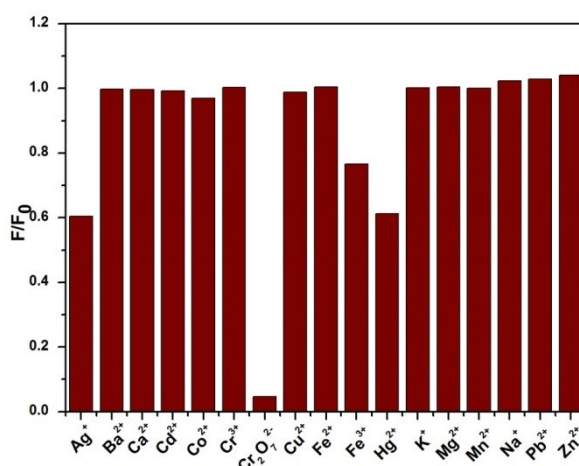

**Figure S8** Fluorescence response of P-CDs in the presence of different metal ions

## Reference

1. D. Sun, R. Ban, P.-H. Zhang, G.-H. Wu, J.-R. Zhang and J.-J. Zhu, *Carbon*, 2013, **64**, 424-434.
